# Supplementary material
Source: ML conference proceedings conference paper supplement (https://proceedings.neurips.cc/paper_files/paper/2018/hash/204da255aea2cd4a75ace6018fad6b4d-Abstract.html)
Supplement: Supplementary file [file 204da255aea2cd4a75ace6018fad6b4d-Supplemental.zip]

# Appendix

We collect in this Appendix all the proofs of the results presented in the paper. Section A contains the main proofs, while Section B contains technical results used in Section A. For completeness' sake, we recall existing theoretical results mentioned in the paper in Section C. Finally, reference to a concentration result as well as a quick summary of the properties of conditional expectation that are used in Section A are collected in Section D and E.

## A Proofs of the main results

**Proof of Lemma 1.** In the proof, we first obtain a bias–variance decomposition of the mean squared error, and then proceed to lower bound the variance term for infinitely many  $n$ .

Since the diversity condition does not hold, there exists  $\delta > 0$  such that, for infinitely many  $n$ ,

$$\mathbb{E} \left[ \sum_{i=1}^n W_{n,i}^2(X) \right] \geq \delta. \quad (\text{A.6})$$

Set  $n$  as in Eq. (A.6). We define the auxiliary estimator  $\bar{\eta}_n$  as

$$\bar{\eta}_n(x) := \sum_{i=1}^n \eta(X_i) W_{n,i}(x) \quad \text{for any } x \in [0, 1]^d. \quad (\text{A.7})$$

According to Lemma 3,

$$\mathbb{E} \left[ |\eta(X) - \hat{\eta}_n(X)|^2 \right] = \mathbb{E} \left[ |\eta(X) - \bar{\eta}_n(X)|^2 \right] + \mathbb{E} \left[ |\bar{\eta}_n(X) - \hat{\eta}_n(X)|^2 \right].$$

We now proceed to lower bound the variance term. First, we condition with respect to  $X, X_{[n]}$  and  $\Theta$  to obtain

$$\mathbb{E} \left[ |\bar{\eta}_n(X) - \hat{\eta}_n(X)|^2 \middle| X, X_{[n]}, \Theta \right] = \text{Var} \left( \bar{\eta}_n(X) - \hat{\eta}_n(X) \middle| X, X_{[n]}, \Theta \right) \quad (\text{Eq. (B.12)})$$

$$\begin{aligned} &= \text{Var} \left( \sum_{i=1}^n (Y_i - \eta(X_i)) W_{n,i}(X) \middle| X, X_{[n]}, \Theta \right) \\ &\quad (\text{definition of } \bar{\eta}_n \text{ (Eq. (A.7)) and } \hat{\eta}_n \text{ (Eq. (2.4))}) \\ &= \text{Var} \left( \sum_{i=1}^n \varepsilon_i W_{n,i}(X) \middle| X, X_{[n]}, \Theta \right) \quad (\text{Eq. (2.1)}) \end{aligned}$$

$$\begin{aligned} &= \sum_{i=1}^n W_{n,i}^2(X) \text{Var}(\varepsilon_i \middle| X, X_{[n]}, \Theta) \\ &\quad (\text{UW-property + independence of the random variables } \varepsilon_i) \\ &= \sum_{i=1}^n W_{n,i}^2(X) \text{Var}(\varepsilon_i) \\ &\quad (\text{each } \varepsilon_i \text{ is independent from } X, X_{[n]} \text{ and } \Theta) \end{aligned}$$

$$\mathbb{E} \left[ |\bar{\eta}_n(X) - \hat{\eta}_n(X)|^2 \middle| X, X_{[n]}, \Theta \right] = \sum_{i=1}^n W_{n,i}^2(X) \sigma^2.$$

By the tower property of the conditional expectation (Prop. 2),

$$\mathbb{E} \left[ |\bar{\eta}_n(X) - \hat{\eta}_n(X)|^2 \right] = \mathbb{E} \left[ \mathbb{E} \left[ |\bar{\eta}_n(X) - \hat{\eta}_n(X)|^2 \middle| X, X_{[n]}, \Theta \right] \right] = \sigma^2 \mathbb{E} \left[ \sum_{i=1}^n W_{n,i}^2(X) \right].$$

Finally, recall that  $n$  was chosen such that  $\mathbb{E} [\sum_{i=1}^n W_{n,i}^2(X)] \geq \delta$ . Thus

$$\mathbb{E} [|\bar{\eta}_n(X) - \hat{\eta}_n(X)|^2] \geq \delta \sigma^2,$$

and we can conclude.  $\square$

**Proof of Lemma 2.** According to the contrapositive of Prop. 6 in Stone (1977), since we assumed that  $\hat{\eta}_n$  has non-negative weights and does not satisfy the locality condition, there exists a bounded continuous function  $\eta : [0, 1]^d \rightarrow \mathbb{R}$  such that the following does not hold:

$$\sum_{i=1}^n W_{n,i}(X) \eta(X_i) \longrightarrow 0 \quad \text{in probability}.$$

Thus we can choose  $\varepsilon > 0$  and  $\delta > 0$  such that

$$\mathbb{P} (|\eta(X) - \bar{\eta}_n(X)| \geq \varepsilon) \geq \delta, \quad (\text{A.8})$$

for infinitely many  $n$ —recall that we defined  $\bar{\eta}_n(x) = \sum_{i=1}^n W_{n,i}(X) \eta(X_i)$ . According to Lemma 3, for any  $n$ ,

$$\mathbb{E} [|\eta(X) - \hat{\eta}_n(X)|^2] = \mathbb{E} [|\eta(X) - \bar{\eta}_n(X)|^2] + \mathbb{E} [|\bar{\eta}_n(X) - \hat{\eta}_n(X)|^2].$$

In particular,

$$\mathbb{E} [|\eta(X) - \hat{\eta}_n(X)|^2] \geq \mathbb{E} [|\eta(X) - \bar{\eta}_n(X)|^2].$$

Let  $n$  be such that Eq. (A.8) holds. Then

$$\begin{aligned} \mathbb{E} [|\eta(X) - \hat{\eta}_n(X)|^2] &\geq \mathbb{E} [|\eta(X) - \bar{\eta}_n(X)|^2] \\ &\geq \mathbb{P} (|\eta(X) - \bar{\eta}_n(X)| \geq \varepsilon) \varepsilon^2 \\ &\quad (\text{Markov's inequality}) \\ \mathbb{E} [|\eta(X) - \hat{\eta}_n(X)|^2] &\geq \delta \varepsilon^2. \end{aligned} \quad (\text{Eq. (A.8)})$$

Since the last display holds for infinitely many  $n$ , we can conclude.  $\square$

**Proof of Theorem 1.** Note that the first assumption of Lemma 1 is satisfied. The major part of the proof is to show that the second assumption of Lemma 1, namely Eq. (A.6), is also satisfied.

In this proof, we write  $W_{n,i}(X)$  short for  $W_{n,i}^\infty(X)$ . Let  $n \in \mathbb{N} \setminus \{0\}$  be as in the nearest-neighbor property. By the definition of the asymptotic weights and the deep tree assumption, for any  $1 \leq i \leq n$ ,

$$W_{n,i}(X) = \mathbb{E}_\Theta \left[ \frac{\mathbb{1}_{X_i \in A(X)}}{N(A(X))} \right] \geq \mathbb{E}_\Theta \left[ \frac{\mathbb{1}_{X_i \in A(X)}}{n_0} \right]. \quad (\text{A.9})$$

Let us denote by  $W_{n,(1)}(X)$  the asymptotic weight corresponding to the nearest-neighbor of  $X$ . Since

$$\sum_{i=1}^n W_{n,i}^2(X) \geq W_{n,(1)}^2(X) \quad \text{a.s.},$$

we have

$$\begin{aligned} \mathbb{E} \left[ \sum_{i=1}^n W_{n,i}^2(X) \right] &\geq \mathbb{E} [W_{n,(1)}^2(X)] \\ &\geq \frac{1}{n_0^2} \mathbb{E} \left[ \left( \mathbb{E}_\Theta [\mathbb{1}_{X_{(1)}(X) \in A(X)}] \right)^2 \right] \\ &\geq \frac{1}{n_0^2} \left( \mathbb{E} \left[ \mathbb{E}_\Theta [\mathbb{1}_{X_{(1)}(X) \in A(X)}] \right] \right)^2 \end{aligned} \quad (\text{Eq. (A.9)})$$

$$\begin{aligned}
& (x \mapsto x^2 \text{ is convex} + \text{Jensen's inequality}) \\
& = \frac{1}{n_0^2} \mathbb{P} \left( X_{(1)}(X) \in A(X) \right)^2 \\
\mathbb{E} \left[ \sum_{i=1}^n W_{n,i}^2(X) \right] & \geq \frac{\varepsilon^2}{n_0^2}. \\
& (\text{nearest-neighbor-preserving property})
\end{aligned}$$

Since  $n_0$  does not depend on  $n$ , the second assumption of Lemma 1 is satisfied for  $\delta = \varepsilon^2/n_0^2$  and we can conclude.  $\square$

**Proof of Theorem 2.** The proof of this result relies on Theorem 1. For both the randomized spill tree and the random projection tree, the UW-property is satisfied. Moreover, by assumption, they are deep trees with almost surely at most  $n_0$  sample points per leaf. Thus we only have to check that the nearest-neighbor-preserving property is satisfied, which we achieve thanks to Theorem 5 with  $k = 1$ .

We first focus on the randomized spill tree case. Let us fix  $x \in [0, 1]^d$ ,  $\delta \in (0, 1/3)$ , and  $\varepsilon \in (0, 1)$ . The hypotheses of Theorem 5 are satisfied: provided that  $1 \leq \alpha n_0/2$ , there is an event  $E$  with probability greater than  $1 - 3\delta$  such that

$$\mathbb{P} \left( X_{(1)}(x) \notin A(x) | E \right) \leq \frac{c_0 d_0}{\alpha} \left( \frac{8 \log 1/\delta}{n_0} \right)^{1/d_0}.$$

By definition of  $n_0$ ,  $1 \leq \alpha n_0/2$  holds for any  $\alpha$  such that

$$\alpha \leq (4 \log 1/\delta)^{d_0-1} \left( \frac{c_0 d_0}{1-\varepsilon} \right)^{\frac{d_0}{d_0-1}} =: \alpha_0,$$

and in this case, we have  $\mathbb{P} \left( X_{(1)}(x) \notin A(x) | E \right) \leq 1 - \varepsilon$ . Since the previous statement is true for any  $x \in [0, 1]^d$ , we have in fact proved that

$$\mathbb{P} \left( X_{(1)}(X) \in A(X) | E \right) \geq \varepsilon.$$

Now, since  $\mathbb{P}(A|B) \mathbb{P}(B) \leq \mathbb{P}(A)$  for any events  $A$  and  $B$ , we obtain

$$\mathbb{P} \left( X_{(1)}(X) \in A(X) \right) \geq \mathbb{P} \left( X_{(1)}(X) \in A(X) | E \right) \mathbb{P}(E) \geq \varepsilon(1 - 3\delta) > 0.$$

In other words, the nearest-neighbor-preserving property of Theorem 1 is satisfied and we can conclude.

The proof for random projection trees is similar, with the difference that we have to check whether  $1 \leq c_0 3^{d_0} \log 1/\delta$ . This is true since  $d_0 \geq 2$ ,  $\delta \in (0, 1/3)$  and one can take  $c_0 \geq 1$  in the statement of Theorem 5. Then, with  $E$  defined as before, according to Theorem 5,

$$\mathbb{P} \left( X_{(1)}(x) \notin A(x) | E \right) \leq c_0 d_0 (d_0 + \log n_0) \left( \frac{8 \log 1/\delta}{n_0} \right)^{1/d_0}.$$

Now,  $n_0 \geq 8 \log 1/\delta \left( \frac{2c_0 d_0^2}{1-\varepsilon} \right)^{d_0}$ , therefore

$$c_0 d_0^2 \left( \frac{8 \log 1/\delta}{n_0} \right)^{1/d_0} \leq \frac{1-\varepsilon}{2}.$$

Moreover, it also holds that  $n_0 \geq \exp \left( \frac{2c_0 d_0^3 (8 \log 1/\delta)^{1/d_0}}{1-\varepsilon} \right)$ . Thus

$$\begin{aligned}
c_0 d_0 \log n_0 \left( \frac{8 \log 1/\delta}{n_0} \right)^{1/d_0} & = c_0 d_0^2 \frac{\log n_0^{1/d_0}}{n_0^{1/d_0}} (8 \log 1/\delta)^{1/d_0} \\
& \leq c_0 d_0^2 \frac{1}{\log n_0^{1/d_0}} (8 \log 1/\delta)^{1/d_0}
\end{aligned}$$

$$\begin{aligned}
& (\log x/x \leq 1/\log x \text{ for any } x > 1) \\
& \leq c_0 d_0^2 \frac{1-\varepsilon}{2c_0 d_0^2 (8 \log 1/\delta)^{1/d_0}} (8 \log 1/\delta)^{1/d_0} \\
c_0 d_0 \log n_0 \left( \frac{8 \log 1/\delta}{n_0} \right)^{1/d_0} & \leq \frac{1-\varepsilon}{2}.
\end{aligned}$$

We deduce

$$\mathbb{P}(X_{(1)}(x) \notin A(x) | E) \leq \frac{1-\varepsilon}{2} + \frac{1-\varepsilon}{2} = 1-\varepsilon.$$

We conclude the proof with the same argument used in the randomized spill trees case.  $\square$

**Proof of Prop. 1.** In this proof we write  $W_{n,i}(X)$  short for  $W_{n,i}^\infty(X)$ . We are going to use Lemma 1 to show that  $\hat{\eta}_{n,\mathbb{V}_\infty}$  is inconsistent.

For any  $n \in \mathbb{N} \setminus \{0\}$ , it holds that  $\sum_{i=1}^n W_{n,i}(X) = 1$  almost surely since each cell contains exactly one sample point. Let  $(a_n)_{n \geq 1}$  be a deterministic sequence such that  $\text{diam}(A(X)) \leq a_n$  holds with probability greater than  $\eta \in (0, 1)$ . Set  $\delta = \eta/2$  and define  $N$  as in Lemma 4. Let  $n \geq N$ . We have

$$\mathbb{E} \left[ \sum_{i=1}^n W_{n,i}(X) \mathbb{1}_{\text{diam}(A(X)) \leq a_n} \right] = \mathbb{P}(\text{diam}(A(X)) \leq a_n) \geq \eta.$$

On the event  $\{\text{diam}(A(X)) \leq a_n\}$ , for any  $1 \leq i \leq n$ , then  $\|X_i - X\| > a_n$  implies  $\|X_i - X\| > \text{diam}(A(X))$ . In turn it holds that  $X_i \notin A(X)$ , i.e.,  $W_{n,i}(X) = 0$ . Therefore,

$$\begin{aligned}
\mathbb{E} \left[ \sum_{i=1}^n W_{n,i}(X) \mathbb{1}_{\text{diam}(A(X)) \leq a_n} \right] &= \mathbb{E} \left[ \sum_{i=1}^n W_{n,i}(X) \mathbb{1}_{\text{diam}(A(X)) \leq a_n} \mathbb{1}_{\|X_i - X\| \leq a_n} \right] \\
&\leq \mathbb{E} \left[ \sum_{i=1}^n W_{n,i}(X) \mathbb{1}_{\|X_i - X\| \leq a_n} \right].
\end{aligned}$$

Thus we have obtained

$$\mathbb{E} \left[ \sum_{i=1}^n W_{n,i}(X) \mathbb{1}_{\|X_i - X\| \leq a_n} \right] \geq \eta.$$

Define  $E$  as the event  $\{\sum_{i=1}^n \mathbb{1}_{\|X_i - X\| \leq a_n} \leq N\}$ . According to the law of total expectation,

$$\begin{aligned}
\mathbb{E} \left[ \sum_{i=1}^n W_{n,i}(X) \mathbb{1}_{\|X_i - X\| \leq a_n} \right] &= \mathbb{E} \left[ \sum_{i=1}^n W_{n,i}(X) \mathbb{1}_{\|X_i - X\| \leq a_n} \middle| E \right] \mathbb{P}(E) \\
&\quad + \mathbb{E} \left[ \sum_{i=1}^n W_{n,i}(X) \mathbb{1}_{\|X_i - X\| \leq a_n} \middle| E^c \right] \mathbb{P}(E^c).
\end{aligned}$$

Thus

$$\begin{aligned}
\mathbb{E} \left[ \sum_{i=1}^n W_{n,i}(X) \mathbb{1}_{\|X_i - X\| \leq a_n} \middle| E \right] \mathbb{P}(E) &= \mathbb{E} \left[ \sum_{i=1}^n W_{n,i}(X) \mathbb{1}_{\|X_i - X\| \leq a_n} \right] \\
&\quad - \mathbb{E} \left[ \sum_{i=1}^n W_{n,i}(X) \mathbb{1}_{\|X_i - X\| \leq a_n} \middle| E^c \right] \mathbb{P}(E^c) \\
&\geq \eta - \mathbb{P}(E^c). \\
&\quad (\sum_{i=1}^n W_{n,i}(X) \mathbb{1}_{\|X_i - X\| \leq a_n} \leq 1 \text{ almost surely})
\end{aligned}$$

According to Lemma 4, we have  $\mathbb{P}(E^c) \leq \delta$  and thus

$$\mathbb{E} \left[ \sum_{i=1}^n W_{n,i}(X) \mathbb{1}_{\|X_i - X\| \leq a_n} \middle| E \right] \geq \frac{\eta}{2}. \quad (\text{A.10})$$

Now, according to the Cauchy-Schwarz inequality for discrete sequences, conditionally to  $E$ ,

$$\left( \sum_{i=1}^n W_{n,i}(X) \mathbb{1}_{\|X_i - X\| \leq a_n} \right)^2 \leq \sum_{i=1}^n W_{n,i}^2(X) \cdot \sum_{i=1}^n \mathbb{1}_{\|X_i - X\| \leq a_n} \leq N \cdot \sum_{i=1}^n W_{n,i}(X)^2. \quad (\text{A.11})$$

We write

$$\begin{aligned} \mathbb{E} \left[ \sum_{i=1}^n W_{n,i}^2(X) \right] &\geq \mathbb{E} \left[ \sum_{i=1}^n W_{n,i}^2(X) \middle| E \right] \mathbb{P}(E) \\ &\quad (\text{law of total expectation + monotony}) \\ &\geq \frac{1}{N} \mathbb{E} \left[ \left( \sum_{i=1}^n W_{n,i}(X) \mathbb{1}_{\|X_i - X\| \leq a_n} \right)^2 \middle| E \right] \mathbb{P}(E) \\ &\quad (\text{Eq. (A.11)}) \\ &\geq \frac{1}{N} \left( \mathbb{E} \left[ \sum_{i=1}^n W_{n,i}(X) \mathbb{1}_{\|X_i - X\| \leq a_n} \middle| E \right] \right)^2 \mathbb{P}(E) \\ &\quad (t \mapsto t^2 \text{ convex} + \text{conditional Jensen's inequality}) \\ \mathbb{E} \left[ \sum_{i=1}^n W_{n,i}^2(X) \right] &\geq \frac{1}{N} \cdot \frac{\eta^2}{4} \cdot (1 - \eta/2). \end{aligned}$$

(Eq. (B.12))

Since  $N$  only depends on quantities that are fixed with respect to  $n$ , we can conclude thanks to Lemma 1.  $\square$

**Proof of Theorem 3.** The sketch of the proof is the following. First, we use Lemma 5 to find a radius  $\rho$  that violates the locality condition for any subsample of the original data. This radius depends on  $m$ , the size of this subsample. But since  $m$  is constant by assumption,  $\rho$  violates the locality condition for any  $n$ . Finally we conclude with Lemma 2.

Let  $\varepsilon \in (0, 1)$ . Set

$$\rho := \frac{1}{2} \left[ \frac{(1 - \varepsilon) \Gamma\left(\frac{d}{2} + 1\right)}{m f_{\max} \pi^{d/2}} \right]^{1/d}.$$

Note that  $\rho$  does not depend on  $n$ . To any subset  $S \subseteq \{1, \dots, n\}$  corresponds the local average estimator  $\hat{\eta}_m^S$  build upon  $(X_i)_{i \in S}$ . We denote by  $W_{m,i}^S$  its weights. We extend this notation to  $W_{n,i}^S = W_{m,i}^S$  if  $i \in S$  and  $W_{n,i}^S = 0$  otherwise. According to Lemma 5, it holds that

$$\mathbb{E} \left[ \sum_{i=1}^n W_{n,i}^S(X) \mathbb{1}_{\|X_i - X\| \geq \rho} \right] \geq \varepsilon.$$

Then, since the weights corresponding to  $\hat{\eta}_n$  satisfy  $W_{n,i} = \mathbb{E}[W_{n,i}^S]$  (where the expectation is with respect to the subsampling), it holds that

$$\mathbb{E} \left[ \sum_{i=1}^n W_{n,i}(X) \mathbb{1}_{\|X_i - X\| \geq \rho} \right] \geq \varepsilon.$$

We conclude with Lemma 2.  $\square$

## B Auxiliary results

In this section, we collect some auxiliary results used in the proofs throughout this paper.

Our first result is a standard bias-variance decomposition used in the proof of Lemma 1 and Lemma 2.

**Lemma 3 (Bias-variance decomposition).** *Suppose that the observations satisfy Eq. (2.1). Then, for any local average estimator  $\hat{\eta}_n$  satisfying the UW-property,*

$$\mathbb{E} \left[ |\eta(X) - \hat{\eta}_n(X)|^2 \right] = \mathbb{E} \left[ |\eta(X) - \bar{\eta}_n(X)|^2 \right] + \mathbb{E} \left[ |\bar{\eta}_n(X) - \hat{\eta}_n(X)|^2 \right].$$

*Proof.* Let  $n$  be an integer. We first decompose the mean squared error as

$$\begin{aligned} \mathbb{E} \left[ |\eta(X) - \hat{\eta}_n(X)|^2 \right] &= \mathbb{E} \left[ |\eta(X) - \bar{\eta}_n(X) + \bar{\eta}_n(X) - \hat{\eta}_n(X)|^2 \right] \\ &= \mathbb{E} \left[ |\eta(X) - \bar{\eta}_n(X)|^2 \right] + \mathbb{E} \left[ |\bar{\eta}_n(X) - \hat{\eta}_n(X)|^2 \right] \\ &\quad + 2 \mathbb{E} [(\eta(X) - \bar{\eta}_n(X))(\bar{\eta}_n(X) - \hat{\eta}_n(X))]. \end{aligned}$$

Further inspection of the double-product term shows that

$$\begin{aligned} \mathbb{E} [(\eta(X) - \bar{\eta}_n(X))(\bar{\eta}_n(X) - \hat{\eta}_n(X))] &= \mathbb{E} \left[ \mathbb{E} [(\eta(X) - \bar{\eta}_n(X))(\bar{\eta}_n(X) - \hat{\eta}_n(X)) | X, X_{[n]}, \Theta] \right] \\ &\quad \text{(tower property)} \\ &= \mathbb{E} [(\eta(X) - \bar{\eta}_n(X)) \mathbb{E} [\bar{\eta}_n(X) - \hat{\eta}_n(X) | X, X_{[n]}, \Theta]] \\ &\quad (\eta(X) \text{ and } \bar{\eta}_n(X) \text{ are } \sigma(X, X_{[n]}, \Theta)\text{-measurable by the UW-property}) \end{aligned}$$

Additionally,

$$\begin{aligned} \mathbb{E} [\bar{\eta}_n(X) - \hat{\eta}_n(X) | X, X_{[n]}, \Theta] &= \bar{\eta}_n(X) - \mathbb{E} [\hat{\eta}_n(X) | X, X_{[n]}, \Theta] \\ &\quad (\bar{\eta}_n(X) \text{ is } \sigma(X, X_{[n]}, \Theta)\text{-measurable by the UW-property}) \\ &= \sum_{i=1}^n \eta(X_i) W_{n,i}(X) - \mathbb{E} \left[ \sum_{i=1}^n W_{n,i}(X) Y_i \middle| X, X_{[n]}, \Theta \right] \\ &\quad \text{(definition of } \bar{\eta}_n \text{ (Eq. (A.7)) and } \hat{\eta}_n \text{ (Eq. (2.4)))} \\ &= \sum_{i=1}^n \eta(X_i) W_{n,i}(X) - \sum_{i=1}^n \mathbb{E} [W_{n,i}(X) Y_i | X, X_{[n]}, \Theta] \\ &\quad \text{(linearity)} \\ \mathbb{E} [\bar{\eta}_n(X) - \hat{\eta}_n(X) | X, X_{[n]}, \Theta] &= \sum_{i=1}^n W_{n,i}(X) \left\{ \eta(X_i) - \mathbb{E} [Y_i | X, X_{[n]}, \Theta] \right\} \\ &\quad (W_{n,i}(X) \text{ is } \sigma(X, X_{[n]}, \Theta)\text{-measurable by the UW-property}) \end{aligned}$$

By irrelevance of independent information (Prop. 2),

$$\mathbb{E} [Y_i | X, X_{[n]}, \Theta] = \mathbb{E} [Y_i | X_i],$$

and by Eq. (2.1),  $\mathbb{E} [Y_i | X_i] = \eta(X_i)$ . We conclude that

$$\mathbb{E} [\bar{\eta}_n(X) - \hat{\eta}_n(X) | X, X_{[n]}, \Theta] = 0, \tag{B.12}$$

and therefore the double-product term vanishes. We have obtained the following decomposition for the mean squared error:

$$\mathbb{E} \left[ |\eta(X) - \hat{\eta}_n(X)|^2 \right] = \mathbb{E} \left[ |\eta(X) - \bar{\eta}_n(X)|^2 \right] + \mathbb{E} \left[ |\bar{\eta}_n(X) - \hat{\eta}_n(X)|^2 \right].$$

□

The following result is used in the proof of Prop. 1 to control the number of sample points falling in a certain ball around  $X$ .

**Lemma 4 (Controlling the number of sample points near  $X$ ).** *Let  $\delta \in (0, 1/2)$ . Under the assumptions of Lemma 1, we can choose constants  $0 < m < M < +\infty$  such that, for any  $n \in \mathbb{N} \setminus \{0\}$ ,  $m \leq a_n n^{1/d} \leq M$ . Set*

$$C := \frac{\Gamma(\frac{d}{2} + 1) \log \frac{4}{\delta}}{m f_{\min}} \left( 1 + \sqrt{1 + 2m f_{\min}} \right),$$

$$N_0 := \frac{(C+1)Mf_{\max}\pi^{d/2}}{\Gamma\left(\frac{d}{2}+1\right)} \quad \text{and} \quad N_1 := \left(\frac{8Mf_{\max}d}{\delta}\right)^d.$$

Then, for any  $n \geq N := \max(N_0, N_1)$ ,

$$\mathbb{P}\left(\sum_{i=1}^n \mathbf{1}_{\|X_i - X\| \leq a_n} > N\right) \leq \delta.$$

*Proof.* Set  $\partial$  the boundary of  $[0, 1]^d$ . We first show that for any fixed  $x \in [0, 1]^d$  far away from the boundary, that is,  $x$  such that  $d(x, \partial) \geq a_n$ , then

$$\mathbb{P}\left(\sum_{i=1}^n \mathbf{1}_{\|X_i - x\| \leq a_n} > N\right) \leq \delta/2.$$

Set  $x \in [0, 1]^d$  such that  $d(x, \partial) \geq a_n$  and  $p := \mu(\mathcal{B}(x, a_n))$ . We write

$$\begin{aligned} \mathbb{P}\left(\sum_{i=1}^n \mathbf{1}_{\|X_i - x\| \leq a_n} > N\right) &\leq \mathbb{P}\left(\sum_{i=1}^n \mathbf{1}_{\|X_i - x\| \leq a_n} > N_0\right) \\ &= \mathbb{P}\left(\frac{1}{n} \sum_{i=1}^n \mathbf{1}_{\|X_i - x\| \leq a_n} - p > \frac{N_0}{n} - p\right) \\ &\leq \mathbb{P}\left(\left|\frac{1}{n} \sum_{i=1}^n \mathbf{1}_{\|X_i - x\| \leq a_n} - p\right| > \frac{N_0}{n} - p\right) \end{aligned}$$

We notice that

$$\begin{aligned} p &= \mu(\mathcal{B}(x, a_n)) && \text{(definition of } \mu) \\ &\geq f_{\min} \mu_{\text{Leb}}(\mathcal{B}(x, a_n) \cap [0, 1]^d) && (\mu \text{ has bounded density on } [0, 1]^d) \\ &= f_{\min} \mu_{\text{Leb}}(\mathcal{B}(x, a_n)) && (\text{we assumed } d(x, \partial) \geq a_n) \\ &= \frac{f_{\min} \pi^{d/2} a_n^d}{\Gamma\left(\frac{d}{2}+1\right)} && \text{(volume of the hypersphere in dimension } d) \\ p &\geq \frac{mf_{\min} \pi^{d/2}}{n \Gamma\left(\frac{d}{2}+1\right)}, && (a_n \geq m/n^{1/d}) \end{aligned}$$

where  $\mu_{\text{Leb}}$  is the Lebesgue measure on  $\mathbb{R}^d$ . The converse direction is similar, and we write

$$\frac{mf_{\min} \pi^{d/2}}{n \Gamma\left(\frac{d}{2}+1\right)} \leq p \leq \frac{Mf_{\max} \pi^{d/2}}{n \Gamma\left(\frac{d}{2}+1\right)}. \quad (\text{B.13})$$

Therefore,

$$\frac{N_0}{(C+1)n} = \frac{Mf_{\max} \pi^{d/2}}{\Gamma\left(\frac{d}{2}+1\right)n} \geq p,$$

and we deduce that  $N_0/n - p > pC$ . As a consequence,

$$\mathbb{P}\left(\sum_{i=1}^n \mathbf{1}_{\|X_i - x\| \leq a_n} > N\right) \leq \mathbb{P}\left(\left|\frac{1}{n} \sum_{i=1}^n \mathbf{1}_{\|X_i - x\| \leq a_n} - p\right| > pC\right).$$

Set

$$Z_n := \frac{1}{n} \sum_{i=1}^n \mathbb{1}_{\|X_i - x\| \leq a_n}.$$

The random variable  $Z_n$  is a normalized sum of independent 0–1-valued Bernoulli random variables taking value 1 with probability  $p$ . Note that  $\sum_i \mathbb{E} \left[ \mathbb{1}_{\|X_i - x\| \leq a_n}^2 \right] = np$ . According to the Bernstein's inequality (Lemma 6), our choice of  $C$  and the lower bound on  $p$ ,

$$\mathbb{P}(|Z_n - p| > pC) \leq 2 \exp \left( -\frac{nC^2p}{2 + 2C/3} \right) \leq \frac{\delta}{2}.$$

We have proved that, for any fixed  $x$  such that  $d(x, \partial) \geq a_n$ ,

$$\mathbb{P} \left( \sum_{i=1}^n \mathbb{1}_{\|X_i - x\| \leq a_n} > N \right) \leq \delta/2.$$

We now focus on the points that are near the boundary of  $[0, 1]^d$ . Since we assumed that  $X$  has bounded density on  $[0, 1]^d$ , it holds that

$$\begin{aligned} \mathbb{P}(d(X, \partial) \leq a_n) &\leq f_{\max} \mu_{\text{Leb}} \left( \left\{ x \in [0, 1]^d \text{ s.t. } d(x, \partial([0, 1]^d)) \leq a_n \right\} \right) \\ &\leq f_{\max} \cdot 4d \cdot a_n \quad (\text{the unit cube has } 2d(d-1)\text{-dimensional faces}) \\ &\leq \frac{4M f_{\max} d}{n^{1/d}} \quad (a_n \leq M/n^{1/d}) \end{aligned}$$

$$\mathbb{P}(d(X, \partial) \leq a_n) \leq \frac{\delta}{2}, \quad (n \geq N_1)$$

and we can conclude.  $\square$

**Lemma 5 (Relation between locality and sample size).** *Suppose that the data satisfy Eq. (2.1) and that  $X$  has bounded density. Consider an infinite random forest estimator  $\hat{\eta}_n$  whose base trees satisfy the two properties listed in Theorem 3. Let  $\varepsilon \in (0, 1)$ . Then, for any*

$$\rho < \left[ \frac{(1 - \varepsilon) \Gamma(\frac{d}{2} + 1)}{n f_{\max} \pi^{d/2}} \right]^{1/d},$$

we have

$$\mathbb{E} \left[ \sum_{i=1}^n W_{ni}(X) \mathbb{1}_{\|X_i - X\| \geq \rho} \right] \geq \varepsilon.$$

*Proof.* The intuition behind the proof is very simple: if  $\rho$  is small enough with respect to the size of the cells, since  $X$  has bounded density on  $[0, 1]^d$ , then it is very unlikely that  $X$  falls into balls of radius  $\rho$  centered in the sample points—see the Right panel of Fig. 1.

First, we notice that

$$\mathbb{E} \left[ \sum_{i=1}^n W_{ni}(X) \mathbb{1}_{\|X_i - X\| \geq \rho} \right] = \mathbb{E} \left[ \sum_{i=1}^n \mathbb{E}_{\Theta} \left[ \frac{\mathbb{1}_{X_i \in A(X)}}{N(A(X))} \right] \mathbb{1}_{\|X_i - X\| \geq \rho} \right].$$

Since the leaves of the tree contain exactly one data point, the leaves are non-empty. Therefore,

$$\mathbb{E} \left[ \sum_{i=1}^n W_{ni}(X) \mathbb{1}_{\|X_i - X\| \geq \rho} \right] = \mathbb{E} \left[ \sum_{i=1}^n \mathbb{1}_{X_i \in A(X)} \mathbb{1}_{\|X_i - X\| \geq \rho} \right].$$



Again, since  $N(A(X)) = 1$  almost surely, we can set unambiguously  $A_i$  the cell containing data point  $X_i$ , and  $X_i \in A(X)$  is equivalent to  $X \in A_i$ . We write

$$\begin{aligned}\mathbb{P}(X_i \in A(X) \text{ and } \|X - X_i\| \geq \rho | X_{[n]}, \Theta) &= \mathbb{P}(X \in A_i \text{ and } \|X - X_i\| \geq \rho | X_{[n]}, \Theta) \\ &= \mathbb{P}(X \in A_i \setminus \mathcal{B}(X_i, \rho) | X_{[n]}, \Theta).\end{aligned}$$

By the union bound,

$$\begin{aligned}\sum_{i=1}^n \mathbb{P}(X_i \in A(X) \text{ and } \|X - X_i\| \geq \rho | X_{[n]}, \Theta) &\geq \mathbb{P}\left(X \in \bigcup_{i=1}^n A_i \setminus \mathcal{B}(X_i, \rho) \middle| X_{[n]}, \Theta\right) \\ &\geq \mathbb{P}\left(X \in [0, 1]^d \setminus \bigcup_{i=1}^n \mathcal{B}(X_i, \rho) \middle| X_{[n]}, \Theta\right) \\ &\quad (\bigcup_i A_i = [0, 1]^d) \\ &\geq 1 - \mathbb{P}\left(X \in \bigcup_{i=1}^n \mathcal{B}(X_i, \rho) \middle| X_{[n]}, \Theta\right) \\ &\quad (\text{union bound}) \\ &\geq 1 - n \cdot \mathbb{P}(X \in \mathcal{B}(X_i, \rho) | X_{[n]}, \Theta) \\ &\quad (\text{satisfies the bounded density assumption}) \\ &\geq 1 - n \cdot f_{\max} \cdot \text{Vol}(\mathcal{B}(X_1, \rho)) \\ \sum_{i=1}^n \mathbb{P}(X_i \in A(X) \text{ and } \|X - X_i\| \geq \rho | X_{[n]}, \Theta) &\geq 1 - \frac{n f_{\max} \pi^{d/2} \rho^d}{\Gamma(\frac{d}{2} + 1)}.\end{aligned}$$

We deduce that

$$\sum_{i=1}^n \mathbb{P}(X_i \in A(X) \text{ and } \|X - X_i\| \geq \rho) \geq 1 - \frac{n f_{\max} \pi^{d/2} \rho^d}{\Gamma(\frac{d}{2} + 1)},$$

and we can conclude.  $\square$

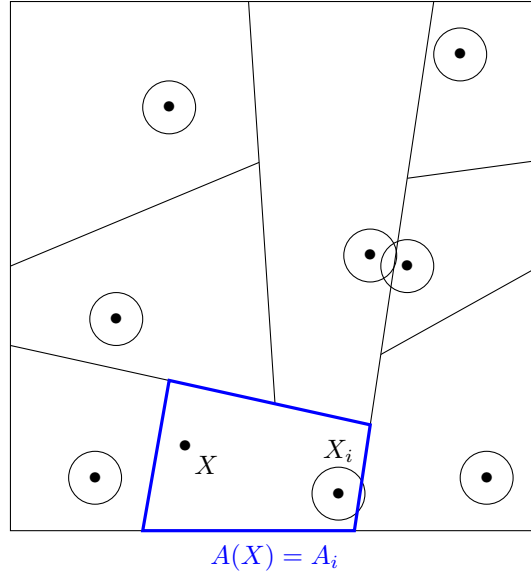

Figure 2: Proof of Lemma 5. The black dots correspond to sample points, the circles around them are of radius  $\rho$ . The cells form a partition of  $[0, 1]^2$ . Here  $X$  belong to the same cell as  $X_i$  (in blue).

## C Previous results

**Theorem 4 (Consistence of local average estimators Stone, 1977, Theorem 1).** *Consider the local average estimator  $\hat{\eta}_n$  defined in Eq. (2.4) and suppose that the following conditions are satisfied.*

1. *There is a  $C \geq 1$  such that, for every nonnegative Borel function  $f$  on  $\mathbb{R}^d$ , and for any  $n \geq 1$ ,*

$$\mathbb{E} \left[ \sum_{i=1}^n |W_{n,i}(X)| f(X_i) \right] \leq C \mathbb{E} [f(X)] .$$

2. *There exists  $D \geq 1$  such that  $\mathbb{P}(\sum_i |W_{n,i}(X)| \leq D) = 1$ , for all  $n \geq 1$ ;*
3.  *$\sum_i |W_{n,i}(X)| \mathbb{1}_{\|X_i - X\| > a} \rightarrow 0$  in probability for all  $a > 0$ ;*
4.  *$\sum_i W_{n,i}(X) \rightarrow 1$  in probability;*
5.  *$\max_i |W_{n,i}(X)| \rightarrow 0$  in probability.*

*Then the local average estimator  $\hat{\eta}_n$  is consistent.*

**Theorem 5 (Nearest-neighbor search guarantees Dasgupta and Sinha, 2015, Theorem 7).** *There is an absolute constant  $c_0$  for which the following holds. Suppose  $\mu$  is a doubling measure on  $\mathbb{R}^d$  of intrinsic dimension  $d_0 \geq 2$ , i.e.,*

$$\forall x \in [0, 1], \quad \forall r > 0, \quad \forall a \geq 1, \quad 0 < \mu(\mathcal{B}(x, ar)) < a^{d_0} \mu(\mathcal{B}(x, r)) .$$

*Pick any query  $x \in [0, 1]^d$  and draw  $X_1, \dots, X_n$  independently from  $\mu$ . Let  $n_0$  be as before the maximal number of sample points in a leaf. For any  $\delta \in (0, 1/3)$ , with probability at least  $1 - 3\delta$  over the choice of data:*

- *For the randomized spill tree, if  $k \leq \alpha n_0/2$ ,*

$$\mathbb{P}(\text{tree fails to return the } k\text{-nearest neighbors of } x) \leq \frac{c_0 d_0 k}{\alpha} \left( \frac{8 \max(k, \log 1/\delta)}{n_0} \right)^{1/d_0} .$$

- *For the random projection tree, if  $k \leq c_0(3k)^{d_0} \max(k, \log 1/\delta)$ ,*

$$\mathbb{P}(\text{tree fails to return the } k\text{-nearest neighbors of } x) \leq c_0 d_0 k (d_0 + \log n_0) \left( \frac{8 \max(k, \log 1/\delta)}{n_0} \right)^{1/d_0} .$$

**Theorem 6 (Convergence w.r.t. number of trees (Scornet, 2016, Theorem 3.1)).** *Define  $K_n(\cdot, \cdot) : [0, 1]^d \times [0, 1]^d \rightarrow [0, 1]$  the random forest connection function as*

$$K_n(x, y) = \mathbb{P}(x \text{ and } y \text{ in the same cell} | \mathcal{D}_n) .$$

*Consider a continuous or discrete random forest, that is, assume  $K_n$  piecewise-constant or continuous for any fixed  $\mathcal{D}_n$ . Then, conditionally on the data  $\mathcal{D}_n$ , for almost every query points  $x \in [0, 1]^d$ , we have*

$$\hat{\eta}_{n, \mathbb{V}_T}(x) \xrightarrow{T \rightarrow +\infty} \hat{\eta}_{n, \mathbb{V}_\infty}(x) .$$

**Theorem 7 (Infinite forests have smaller risks (Scornet, 2016, Theorem 3.3)).** *Suppose that*

$$Y = \eta(X) + \varepsilon ,$$

*where  $\varepsilon$  is a centered Gaussian random variable with finite variance  $\sigma^2$ , independent of  $X$ . Assume also that  $\|\eta\|_\infty < \infty$ . Then, for all  $T, n \in \mathbb{N} \setminus \{0\}$ ,*

$$\mathbb{E} \left[ |\hat{\eta}_{n, \mathbb{V}_T}(X) - \eta(X)|^2 \right] = \mathbb{E} \left[ |\hat{\eta}_{n, \mathbb{V}_\infty}(X) - \eta(X)|^2 \right] + \frac{1}{T} \mathbb{E}_{X, \mathcal{D}_n} [\text{Var}_\Theta(\hat{\eta}_{n, A}(X))] .$$

## D A concentration inequality

The following result is known as the Bernstein's inequality.

**Lemma 6 (Bernstein's inequality (Boucheron et al., 2013, Eq. (2.10))).** *Let  $Z_1, \dots, Z_n$  be independent random variables. Assume that there exist positive numbers  $b$  and  $v$  such that*

$$\forall 1 \leq i \leq n, |Z_i| \leq b \quad \text{a.s.,} \quad \text{and} \quad \sum_i \mathbb{E}[Z_i^2] \leq v.$$

*Then, for any  $t > 0$ ,*

$$\mathbb{P}\left(\sum_i Z_i - \mathbb{E}[Z_i] > t\right) \leq \exp\left(-\frac{t^2}{2(v + bt/3)}\right).$$

## E Conditional expectation

In this section, we recall the basic properties of the conditional expectation that are used throughout this paper. We refer to Billingsley (2008, Chapter 6, Section 34) for a proof of the following facts.

**Proposition 2 (Basic properties of conditional expectation).** *Let  $X$  and  $Y$  be integrable random variables, let  $\mathcal{G}$  and  $\mathcal{H}$  be subalgebras of  $\mathcal{F}$ . Then the following hold:*

1. (linearity) *For any real numbers  $\alpha, \beta$ ,*

$$\mathbb{E}[\alpha X + \beta Y | \mathcal{G}] = \alpha \mathbb{E}[X | \mathcal{G}] + \beta \mathbb{E}[Y | \mathcal{G}] \quad \text{a.s.}$$

2. (monotonicity) *If  $X \leq Y$  a.s., then  $\mathbb{E}[X | \mathcal{G}] \leq \mathbb{E}[Y | \mathcal{G}]$  a.s.*

3. (conditional Jensen) *If  $f$  is a convex function such that  $f(X)$  is integrable, then*

$$\mathbb{E}[f(X) | \mathcal{G}] \leq f(\mathbb{E}[X | \mathcal{G}]) \quad \text{a.s.}$$

4. (measurability) *If  $Y$  is  $\mathcal{G}$ -measurable and  $XY$  is integrable, then*

$$\mathbb{E}[XY | \mathcal{G}] = Y \mathbb{E}[X | \mathcal{G}] \quad \text{a.s.}$$

5. (tower property) *If  $\mathcal{H} \subseteq \mathcal{G}$ , then*

$$\mathbb{E}[\mathbb{E}[X | \mathcal{G}] | \mathcal{H}] = \mathbb{E}[X | \mathcal{H}] \quad \text{a.s.}$$

6. (irrelevance of independent information) *If  $\mathcal{H}$  is independent of  $\sigma(\mathcal{G}, X)$ , then*

$$\mathbb{E}[X | \sigma(\mathcal{G}, \mathcal{H})] = \mathbb{E}[X | \mathcal{G}] \quad \text{a.s.}$$

*In particular, if  $X$  is independent of  $\mathcal{H}$ , then  $\mathbb{E}[X | \mathcal{H}] = \mathbb{E}[X]$  a.s.*
